# Supplementary material for: Nutritional Assessment in Inflammatory Bowel Disease (IBD)—Development of the Groningen IBD Nutritional Questionnaires (GINQ)
Source: MDPI journal article supplement (doi:10.3390/nu11112739), 2019-11-12
Supplement: s1 [file s1]

**Supplementary table 1.** Identification of foods

| Main category      | Food items                                | Products                                                                                                                                                              |
|--------------------|-------------------------------------------|-----------------------------------------------------------------------------------------------------------------------------------------------------------------------|
| Breakfast products | Breakfast drinks (readymade) <sup>+</sup> |                                                                                                                                                                       |
| Breakfast grains   | Breakfast cereals                         | Muesli<br>Crueli<br>Wheat germ<br>Bran<br>Oatmeal<br>Brinta<br>Semolina                                                                                               |
|                    | Porridge grains                           | Cornflakes<br>Rice crispies                                                                                                                                           |
|                    | Processed grains                          |                                                                                                                                                                       |
| Dairy              | Milk <sup>+</sup>                         | Whole<br>Semi-skimmed<br>Skimmed<br>Buttermilk                                                                                                                        |
|                    | Milk alternatives <sup>+</sup>            | Lactose free<br>Goat or sheep milk<br>Soy milk<br>Oat milk<br>Rice milk<br>Coconut milk<br>Almond milk                                                                |
|                    | Chocolate milk                            | Whole<br>Semi-skimmed<br>Skimmed<br>Oat milk<br>Soy milk                                                                                                              |
|                    | Sweetened dairy drinks                    | Fruits<br>Soy<br>Other types of sweetened dairy drinks                                                                                                                |
|                    | Health-improving dairy                    | Cholesterol lowering drinks<br>Blood pressure lowering drinks<br>Probiotic drinks                                                                                     |
|                    | Yogurt <sup>+</sup>                       | Whole<br>Semi-skimmed<br>Skimmed<br>Soy<br>Goat or sheep<br>Sweetened/flavoured<br>Fruits                                                                             |
|                    | Quark <sup>+</sup>                        | Whole<br>Semi-skimmed<br>Skimmed<br>Soy<br>Goat or sheep<br>Sweetened/flavoured<br>Fruits                                                                             |
|                    | Dutch custard                             | Whole<br>Semi-skimmed<br>Skimmed<br>Soy<br>Goat or sheep<br>Sweetened/flavoured (vanille, chocolate, etc.)<br>Fruits                                                  |
|                    | Ready-made porridge / pudding / dessert   | Sweetened/flavoured<br>Soy                                                                                                                                            |
|                    | Homemade porridge / pudding               | Custard<br>Rice pudding<br>Semolina pudding                                                                                                                           |
|                    | Sweeteners added to yogurt / quark / etc  | Sugar<br>Syrup<br>Honey<br>Artificial sweeteners                                                                                                                      |
|                    | Ice cream products                        | Milk-based<br>Soy-based<br>Water-based<br>Milkshake                                                                                                                   |
|                    | Hard cheeses <sup>+</sup>                 | Soft-ripened<br>Washed-rind<br>Smear-ripened<br>Blue<br>Brined<br>Processed<br>Goat or sheep cheese<br>Parmesan cheese                                                |
|                    | Soft cheeses <sup>+</sup>                 | Dairy spreads<br>Hüttekäse<br>Cream cheese<br>Foreign cheeses<br>Goat or sheep cheese<br>Processed cheese spread<br>Mozzarella<br>Mascarpone<br>Feta<br>Grated cheese |

|                             |                                           |                                                                                                          |
|-----------------------------|-------------------------------------------|----------------------------------------------------------------------------------------------------------|
|                             | Cream <sup>+</sup>                        | Sour cream<br>Creme fraiche<br>Cream (for cooking)<br>Whipped cream (fresh)<br>Whipped cream (spray can) |
| Bread and bread substitutes | Rusk / biscuit                            | White                                                                                                    |
|                             | Knäckebröd                                | Whole grain                                                                                              |
|                             | Breakfast crackers/crispbread             | Multigrain                                                                                               |
|                             |                                           | White                                                                                                    |
|                             |                                           | Whole grain                                                                                              |
|                             | Croissants                                | Multigrain                                                                                               |
|                             |                                           | Spelt                                                                                                    |
|                             |                                           | White                                                                                                    |
|                             |                                           | Whole grain                                                                                              |
|                             |                                           | Spelt                                                                                                    |
|                             | Hard rolls/ rustic rolls <sup>+</sup>     | Cheese                                                                                                   |
|                             |                                           | Ham/cheese                                                                                               |
|                             |                                           | White                                                                                                    |
|                             |                                           | Brown                                                                                                    |
|                             |                                           | Whole grain                                                                                              |
|                             |                                           | Multigrain                                                                                               |
|                             |                                           | Raisins / dried currants                                                                                 |
|                             |                                           | Bagels                                                                                                   |
|                             |                                           | English muffin                                                                                           |
|                             |                                           | Remaining bread products                                                                                 |
|                             | Buns/rolls <sup>+</sup>                   | White                                                                                                    |
|                             | Bread slices/sandwich bread <sup>+</sup>  | Brown                                                                                                    |
|                             |                                           | Whole grain                                                                                              |
|                             |                                           | Multigrain                                                                                               |
|                             |                                           | Raisins / dried currants                                                                                 |
|                             |                                           | Muesli                                                                                                   |
|                             |                                           | Remaining bread products                                                                                 |
|                             |                                           | White                                                                                                    |
|                             |                                           | Brown                                                                                                    |
|                             |                                           | Whole grain                                                                                              |
|                             |                                           | Multigrain                                                                                               |
| Fats/oils                   | Butter spreads <sup>+</sup>               | Spelt                                                                                                    |
|                             |                                           | Raisins / dried currants                                                                                 |
|                             |                                           | Muesli                                                                                                   |
|                             |                                           | Pumpernickel rye bread (light)                                                                           |
|                             |                                           | Pumpernickel rye bread (dark)                                                                            |
|                             |                                           | Sourdough                                                                                                |
|                             |                                           | Remaining bread products                                                                                 |
|                             |                                           | Butter                                                                                                   |
|                             |                                           | Semi-skimmed butter                                                                                      |
|                             |                                           | Margarine (tub)                                                                                          |
|                             | Cooking fats/oils                         | Margarine (package)                                                                                      |
|                             |                                           | Diet margarine                                                                                           |
|                             |                                           | Margarine with plant sterols/-stanols                                                                    |
|                             |                                           | Low-fat butter                                                                                           |
|                             |                                           | Diet low-fat butter                                                                                      |
|                             |                                           | Low-fat butter with plant sterols/-stanols                                                               |
|                             |                                           | Other types of spreads/butter                                                                            |
|                             |                                           | No spread/butter                                                                                         |
|                             |                                           | Olive oil                                                                                                |
|                             |                                           | Peanut oil                                                                                               |
|                             |                                           | Sunflower oil                                                                                            |
|                             |                                           | Sesame oil                                                                                               |
|                             |                                           | Liquid margarine                                                                                         |
|                             |                                           | Baking and roasting products (solid)                                                                     |
|                             |                                           | Baking and roasting products (liquid)                                                                    |
|                             |                                           | Lard/bacon fat                                                                                           |
|                             |                                           | Spray can fats                                                                                           |
|                             |                                           | Peanut butter                                                                                            |
|                             |                                           | Nut paste (cashew, hazelnut, etc.)                                                                       |
|                             |                                           | Sesame paste (tahin)                                                                                     |
| Spreads                     | Nut pastas <sup>+</sup>                   | Sesame paste (tahin)                                                                                     |
|                             |                                           | Chocolate sprinkles or flakes                                                                            |
|                             |                                           | Chocolate paste                                                                                          |
|                             |                                           | Hazelnut chocolate pasta                                                                                 |
|                             |                                           | Chocolate butter                                                                                         |
|                             |                                           | Chocolate slices                                                                                         |
|                             |                                           | Fruit sprinkles / forest fruit sprinkles                                                                 |
|                             |                                           | Ground aniseed sprinkles / anise sprinkles ("gestamppte muisjes" / "roze of blauwe muisjes")             |
|                             |                                           | Jam/marmelade <sup>+</sup>                                                                               |
|                             |                                           | Gingerbread sprinkles ("Schuddebuikjes")                                                                 |
|                             | Sweet spreads                             | Anise sprinkles ("Anijshagelslag")                                                                       |
|                             |                                           | Dutch Spiced Cookies Biscuits ("speculaas")                                                              |
|                             |                                           | Apple / pear syrup/jam                                                                                   |
|                             |                                           | Honey <sup>+</sup>                                                                                       |
|                             |                                           | Sugar <sup>+</sup>                                                                                       |
|                             |                                           | Humus                                                                                                    |
|                             |                                           | Marmite                                                                                                  |
|                             |                                           | Sandwichspread                                                                                           |
|                             |                                           | Egg salad                                                                                                |
|                             |                                           | Chicken curry salad                                                                                      |
|                             | Savory (salad/humus) spreads <sup>+</sup> | Pesto                                                                                                    |

|                           |                                                  |                                                                                  |
|---------------------------|--------------------------------------------------|----------------------------------------------------------------------------------|
|                           |                                                  | Tapenade                                                                         |
|                           |                                                  | Remaining type of salad / sandwichspread                                         |
| Eggs                      | Fried eggs <sup>+</sup>                          | Fried eggs                                                                       |
|                           | Boiled eggs <sup>+</sup>                         | Omelet                                                                           |
|                           |                                                  | Boiled                                                                           |
|                           |                                                  | Poached                                                                          |
| Fruits                    | Dried fruits <sup>+</sup>                        | Cranberries                                                                      |
|                           |                                                  | Apricots                                                                         |
|                           |                                                  | Plums                                                                            |
|                           |                                                  | Apple                                                                            |
|                           |                                                  | Pears                                                                            |
|                           |                                                  | Dates                                                                            |
|                           |                                                  | Raisins                                                                          |
|                           |                                                  | Currants                                                                         |
|                           |                                                  | Tutti-frutti                                                                     |
|                           |                                                  | Figs                                                                             |
|                           |                                                  | Mango                                                                            |
|                           |                                                  | Banana                                                                           |
|                           |                                                  | Strawberries                                                                     |
|                           |                                                  | Apricots                                                                         |
|                           |                                                  | Pineapple                                                                        |
|                           | Fresh fruits <sup>+</sup>                        | Apple                                                                            |
|                           |                                                  | Avocado                                                                          |
|                           |                                                  | Banana                                                                           |
|                           |                                                  | Berries                                                                          |
|                           |                                                  | Citrus fruit such as lemon, lime, orange, mandarin, grapefruit                   |
|                           |                                                  | Dates                                                                            |
|                           |                                                  | Grapes                                                                           |
|                           |                                                  | Raspberries                                                                      |
|                           |                                                  | Pomegranate                                                                      |
|                           |                                                  | Cherries                                                                         |
|                           |                                                  | Kiwi                                                                             |
|                           |                                                  | Coconut                                                                          |
|                           |                                                  | Mango                                                                            |
|                           |                                                  | Melon                                                                            |
|                           |                                                  | Nectarines                                                                       |
|                           |                                                  | Passion fruit                                                                    |
|                           |                                                  | Pear                                                                             |
|                           |                                                  | Peach                                                                            |
|                           |                                                  | Plums                                                                            |
|                           |                                                  | Figs                                                                             |
|                           |                                                  | Other types of fruit                                                             |
|                           | Processed fruits / Preserved fruits <sup>+</sup> | Apple sauce                                                                      |
|                           |                                                  | Cocktail fruit                                                                   |
|                           |                                                  | Prepackaged and sliced fruits / fruit salads                                     |
|                           |                                                  | Frozen fruits                                                                    |
| Nuts, stone fruits, seeds | Nuts, stone fruits <sup>+,+</sup>                | Almonds                                                                          |
|                           |                                                  | Cashew nuts                                                                      |
|                           |                                                  | Hazelnuts                                                                        |
|                           |                                                  | Macadamia nuts                                                                   |
|                           |                                                  | Brazil nuts                                                                      |
|                           |                                                  | Pecans                                                                           |
|                           |                                                  | Pistachio nuts                                                                   |
|                           |                                                  | Walnuts                                                                          |
|                           |                                                  | Chestnut                                                                         |
|                           |                                                  | Coconut                                                                          |
|                           | Peanuts <sup>+,+</sup>                           | Bar mix                                                                          |
|                           |                                                  | Peanuts                                                                          |
|                           | Seeds <sup>+,+</sup>                             | Pumpkin seeds                                                                    |
|                           |                                                  | Sesame seed                                                                      |
|                           |                                                  | Sunflower seeds                                                                  |
|                           |                                                  | Poppy seeds                                                                      |
|                           |                                                  | Pomegranate seeds                                                                |
|                           |                                                  | Pine nuts                                                                        |
| Meat and meat substitutes | Raw cold cuts <sup>+</sup>                       | Filet américain                                                                  |
|                           |                                                  | Roast beef                                                                       |
|                           |                                                  | Carpaccio                                                                        |
|                           | Processed cold cuts <sup>+</sup>                 | Boiled liver                                                                     |
|                           |                                                  | Liver sausage, pâté, liver pâté, liver cheese, berliner liver sausage            |
|                           |                                                  | Smoked meat ("rookvlees"), "fricandeau", gammon, chicken fillet, chicken roulade |
|                           |                                                  | Bacon ("ontbijtspek", "katenspek")                                               |
|                           |                                                  | Cervelat, salami                                                                 |
|                           |                                                  | Sausage, roasted meat                                                            |
|                           |                                                  | Grilled or cooked ham                                                            |
|                           |                                                  | Other types of cold cuts                                                         |
|                           | Meat <sup>+</sup>                                | Beef                                                                             |
|                           |                                                  | Veal                                                                             |
|                           |                                                  | Pork                                                                             |
|                           |                                                  | Bacon                                                                            |
|                           |                                                  | Poultry                                                                          |
|                           | Gravy                                            | Other types of meat                                                              |
|                           |                                                  | Organ meat: liver, tongue, kidneys, brains, sweetbread                           |
|                           |                                                  | Game: grouse, moose, deer, hare, etc.                                            |
|                           |                                                  | Lamb, goat, sheep, etc.                                                          |
|                           |                                                  | Meat gravy                                                                       |

|            |                                    |                                                                                                                                                                                                                                                                                                                                                                                                                                                                                                                                                                                                                                                                                                                                                                                                                                                         |
|------------|------------------------------------|---------------------------------------------------------------------------------------------------------------------------------------------------------------------------------------------------------------------------------------------------------------------------------------------------------------------------------------------------------------------------------------------------------------------------------------------------------------------------------------------------------------------------------------------------------------------------------------------------------------------------------------------------------------------------------------------------------------------------------------------------------------------------------------------------------------------------------------------------------|
|            | Meat substitutes                   | Prepackaged gravy / gravy powder<br>Tofu<br>Tempeh<br>Seitan<br>Quorn<br>Valess<br>Falafel<br>Ready-made meat substitutes                                                                                                                                                                                                                                                                                                                                                                                                                                                                                                                                                                                                                                                                                                                               |
| Fish       | Fresh fish <sup>+</sup>            | Fatty fish<br>White fish                                                                                                                                                                                                                                                                                                                                                                                                                                                                                                                                                                                                                                                                                                                                                                                                                                |
|            | Raw fish <sup>+</sup>              | Salty herring<br>Sushi<br>Caviar                                                                                                                                                                                                                                                                                                                                                                                                                                                                                                                                                                                                                                                                                                                                                                                                                        |
|            | Processed fish <sup>+</sup>        | Fried haddock<br>Canned fish (tuna, salmon, sardines, etc.)<br>Smoked fish (salmon, etc.)<br>Vis sticks                                                                                                                                                                                                                                                                                                                                                                                                                                                                                                                                                                                                                                                                                                                                                 |
|            | Shellfish and seafood <sup>+</sup> | Lobster<br>Shrimps<br>Crab<br>Mussels<br>Oysters<br>Squid<br>Escargot<br>Seaweed<br>Other types of shellfish and crustaceans                                                                                                                                                                                                                                                                                                                                                                                                                                                                                                                                                                                                                                                                                                                            |
| Vegetables | Vegetables <sup>+</sup>            | Jerusalem artichoke<br>Endive<br>Artichoke<br>Asparagus (green)<br>Asparagus (white)<br>Eggplant<br>Celery<br>Cauliflower<br>Kale<br>Spring onion/scallions<br>Broccoli<br>Mushrooms<br>Cherry tomato<br>Chinese cabbage<br>Zucchini<br>Garden peas<br>Green cabbage<br>Iceberg lettuce<br>Cucumber<br>Kohlrabi<br>Cabbage lettuce<br>Sea lavender/limonium<br>Corn<br>Pak Choy<br>Bell pepper<br>Pea pods<br>Pumpkin<br>Purslane<br>Leeks<br>Turnips<br>Turnip stalks<br>Rhubarb<br>Radicchio<br>Radish<br>Rettich<br>Beetroot<br>Red cabbage<br>Savoy<br>Salsify<br>Haricot<br>Green bean<br>Spinach<br>Pointed cabbage<br>Brussels sprouts<br>Bean sprouts<br>Tomato<br>Broad bean<br>Onion<br>Lamb's lettuce<br>Fennel<br>Winter purslane<br>Belgian endive/chicory<br>White cabbage<br>Carrots<br>Samphire/sea beans<br>Sweet potato<br>Sauerkraut |
|            | Raw vegetables <sup>+</sup>        | Endive<br>Pickle<br>Avocado                                                                                                                                                                                                                                                                                                                                                                                                                                                                                                                                                                                                                                                                                                                                                                                                                             |

|                    |                                                                                                                                                                                                                                                      |                                                                                                                                                                                                                                                                                                                                                                                                                             |
|--------------------|------------------------------------------------------------------------------------------------------------------------------------------------------------------------------------------------------------------------------------------------------|-----------------------------------------------------------------------------------------------------------------------------------------------------------------------------------------------------------------------------------------------------------------------------------------------------------------------------------------------------------------------------------------------------------------------------|
|                    |                                                                                                                                                                                                                                                      | Celery<br>Cauliflower<br>Kale<br>Cucumber with peel<br>Cucumber without peel<br>Cabbage types<br>Paprika<br>Radish<br>Lettuce: iceberg<br>Lettuce: head lettuce<br>Lettuce: Arugula<br>Lettuce: lamb's lettuce<br>Spinach<br>Bean sprouts<br>Tomato<br>Cress<br>Onion<br>Fennel<br>Belgian endive/chicory<br>Root<br>Silverskin unions                                                                                      |
| Legumes            | Legumes <sup>+</sup>                                                                                                                                                                                                                                 | Brown, white, black beans<br>Split peas<br>Capuchin<br>Green beans (borlotti)<br>Lima beans<br>Lentils<br>Chickpeas<br>Kidney beans<br>Soybeans                                                                                                                                                                                                                                                                             |
| Grain products     | Pasta <sup>+</sup><br><br><br><br><br><br><br><br><br><br>Rice / other grains <sup>+</sup><br><br><br><br><br><br><br><br><br><br>Potatoes <sup>+</sup><br><br><br><br><br><br><br><br><br><br>Toast, bread, wraps, pita, baguette, etc <sup>+</sup> | White<br>Whole grain<br>Stuffed pasta / home-made pasta<br>Noodles/ramen<br>Pasta salads<br><br>White<br>Brown<br>African<br>Risotto<br>Nut rice<br>Couscous<br>Bulgur<br>Quinoa<br>Cauliflower / broccoli<br>Millet, barley<br><br>Boiled oder mashed<br>Fries<br>Baked/fried<br>Potato slices, croquettes, rösti etc.<br><br>Wraps, fajitas, tortilla's<br>Taco's<br>Turkish bread<br>Nan bread<br>Pita bread<br>Baguette |
| Sauces             | Warm sauces<br><br><br><br><br><br><br><br><br><br>Dressing <sup>+</sup><br><br><br><br><br><br><br><br><br><br>Red sauces <sup>+</sup><br><br><br><br><br><br><br><br><br><br>Mayonnaise and other non-red sauces <sup>+</sup>                      | Bechamel/white sauce<br>Mushroom<br>Hollandaise<br>Cheese<br>Satay<br>Tomato<br>Other types of warm sauces<br>Oil-based dressing<br>Mayonnaise-based dressing<br>Yoghurt-based dressing<br>Other types of dressing<br>Ketchup/curry<br>Chilisauce<br>BBQ sauce<br>Mayonnaise<br>Fry sauce<br>Garlic sauce<br>Cocktail sauce<br>Mosterd<br>Soy sauce<br>Fish sauce<br>Wasabi                                                 |
| Additions to meals | Super foods <sup>+</sup><br><br><br><br><br><br><br><br><br><br>Seasoning <sup>+</sup>                                                                                                                                                               | Goji berries<br>Dried mulberries<br>Flax seeds<br>Chia seeds<br>Hemp seeds<br>Sweet soy sauce<br>Sambal<br>Shiracha<br>Lemon juice                                                                                                                                                                                                                                                                                          |

|               |                                                                      |                                                                                                                                                                                                                                                                                                                                                                                                                      |
|---------------|----------------------------------------------------------------------|----------------------------------------------------------------------------------------------------------------------------------------------------------------------------------------------------------------------------------------------------------------------------------------------------------------------------------------------------------------------------------------------------------------------|
|               |                                                                      | Vinegar<br>Balsamic vinegar<br>Maggi seasoning sauce<br>Mango chutney<br>Mustard<br>Dessicated coconut<br>Shrimp paste (Terasi)<br>Salt<br>Nutritional yeast<br>Tomato paste<br>Instant bouillon cubes / powder<br>Miso                                                                                                                                                                                              |
|               | Spices & herbs <sup>+</sup>                                          | Anise<br>Basil<br>Chives<br>Chili pepper / cayenne pepper<br>Lemongrass<br>Dill<br>Dragon<br>Mace<br>Ginger<br>Cinnamon<br>Cardamom<br>Caraway<br>Curry<br>Chervil<br>Garlic<br>Cumin<br>Coriander<br>Clove<br>Turmeric<br>Laos<br>Bay leaves<br>Lovage<br>Marjoram<br>Spearmint<br>Nutmeg<br>Oregano<br>Paprika<br>Pepper<br>Parsley<br>Rosemary<br>Saffron<br>Sage<br>Celery<br>Thyme<br>Cress<br>Onion<br>Vanilla |
|               | Spiciness                                                            | Midly spiced<br>Extremely spiced                                                                                                                                                                                                                                                                                                                                                                                     |
|               | Olives / bell peppers <sup>+</sup>                                   | Black olives<br>Green olives<br>Pappadew<br>Grilled bell pepers                                                                                                                                                                                                                                                                                                                                                      |
| Fast food     | Fast food <sup>+</sup>                                               | Chinese/Indian take out<br>Burgers/fries take out<br>Pizza take out, frozen, home-made<br>Tacos/burritos take out<br>Donor / shawarma / gyros take out<br>Noodles take out<br>Asian streetfood take out<br>Other types of take out food<br>Ready made meals (bought in supermarket)<br>Pancakes<br>"Poffertjes"                                                                                                      |
| Soup          | Soup <sup>+</sup>                                                    | Cream soup<br>Bouillon<br>Instant soup                                                                                                                                                                                                                                                                                                                                                                               |
| Savory snacks | Chips / pretzels<br><br><br><br><br><br><br><br><br><br>Fried snacks | Potato-based<br>Rice-based<br>Popcorn <sup>+</sup><br>Vegetable-based<br>"Kroket" (croquette)<br>"Bitterballen" (round croquettes)<br>"Eierbal" (round croquette with a boiled egg in the middle)<br>"Frikandel" (minced meat hot dog)<br>"Kaassoufflé" (cheese souffle)<br>"Saucijzenbroodje"/"worstenbroodje" (sausage roll pastries)<br>Other types of fried snacks                                               |
| Sweet snacks  | Chewing gum<br><br><br>Licorice<br><br>Sweets/candy<br>Bonbon        | With sugar<br>Without sugar<br>Salt<br>Sweet<br>Winegums, etc.<br>With nuts                                                                                                                                                                                                                                                                                                                                          |

|           |                                                               |                                                                                                                                                                                                                                                                                           |
|-----------|---------------------------------------------------------------|-------------------------------------------------------------------------------------------------------------------------------------------------------------------------------------------------------------------------------------------------------------------------------------------|
|           | Chocolate                                                     | With alcohol<br>With/without nuts<br>Dark, milk, white                                                                                                                                                                                                                                    |
|           | Candy bars                                                    | Celebrations, normal, king-size                                                                                                                                                                                                                                                           |
|           | Gingerbread <sup>+</sup> / cookie bars / nutritional biscuits | Normal gingerbread<br>Whole grain gingerbread<br>White sugar candy gingerbread<br>Raisins gingerbread<br>Nuts gingerbread<br>Sweetened flavors gingerbread: apple, caramel, ginger, sea salt-caramel, chocolate, etc.<br>"Captein koek"<br>Liga<br>Sultana<br>Muesli bars<br>Protein bars |
|           | Cake / large biscuits                                         | Cake<br>Large (filled) cookies<br>Doughnuts<br>Brownies                                                                                                                                                                                                                                   |
|           | Small cookies / biscuits                                      | Biscuits, cookies, "speculaas", "pepernoten", etc.                                                                                                                                                                                                                                        |
|           | Pastry / pie                                                  | Pastry<br>Pie                                                                                                                                                                                                                                                                             |
| Beverages | Fruit juice                                                   | Prepackaged fruit juice<br>Fresh/smoothie<br>Slow-juice<br>Apple<br>Pear<br>Orange<br>Grapefruit<br>Mango<br>Berries<br>Multivitamin                                                                                                                                                      |
|           |                                                               | Prepackaged vegetable juice<br>Fresh/smoothie<br>Slow-juice<br>Tomato<br>Carrot<br>Beetroot<br>Pickle                                                                                                                                                                                     |
|           |                                                               |                                                                                                                                                                                                                                                                                           |
|           |                                                               |                                                                                                                                                                                                                                                                                           |
|           |                                                               |                                                                                                                                                                                                                                                                                           |
|           |                                                               |                                                                                                                                                                                                                                                                                           |
|           |                                                               |                                                                                                                                                                                                                                                                                           |
|           |                                                               |                                                                                                                                                                                                                                                                                           |
|           |                                                               |                                                                                                                                                                                                                                                                                           |
|           |                                                               |                                                                                                                                                                                                                                                                                           |
|           | Tap water                                                     |                                                                                                                                                                                                                                                                                           |
|           | Bottled water / sparkled water                                |                                                                                                                                                                                                                                                                                           |
|           | Coffee <sup>•</sup>                                           | Caffeinated/decaffeinated<br>Coffee, cappuccino, espresso<br>Fresh, filter, instant                                                                                                                                                                                                       |
|           | Tea                                                           | Black<br>Green<br>Herbs<br>Fruit                                                                                                                                                                                                                                                          |
|           |                                                               | Whole                                                                                                                                                                                                                                                                                     |
|           |                                                               | Semi-skimmed<br>Skimmed                                                                                                                                                                                                                                                                   |
|           |                                                               | Soy, oats, almond, rice, etc.<br>Whitner/creamers                                                                                                                                                                                                                                         |
|           | Sweeteners <sup>+</sup>                                       | Sugar<br>Honey<br>Agave/maple syrup<br>Artificial sweeteners                                                                                                                                                                                                                              |
|           |                                                               | Carbonated, non-carbonated<br>Iced tea<br>Syrup lemonade                                                                                                                                                                                                                                  |
|           |                                                               |                                                                                                                                                                                                                                                                                           |
|           | Lemonade                                                      |                                                                                                                                                                                                                                                                                           |
|           | Sport drinks                                                  |                                                                                                                                                                                                                                                                                           |
|           | Energy drinks                                                 |                                                                                                                                                                                                                                                                                           |
|           | Protein shakes                                                |                                                                                                                                                                                                                                                                                           |
|           | Alcoholic beverages                                           | Beer<br>Wine<br>Fortified wines<br>Spiritis<br>Mixed drinks<br>Other types of alcoholic drinks<br>Non-alcoholic drinks                                                                                                                                                                    |

<sup>•</sup> Added to meals (breakfast, lunch, dinner) (or beverages) or eaten as snack in between meals

<sup>+</sup> Salted or unsalted

<sup>•</sup> Caffeinated or decaffeinated
