# Supplementary material for: Nutritional Assessment in Inflammatory Bowel Disease (IBD)—Development of the Groningen IBD Nutritional Questionnaires (GINQ)
Source: MDPI journal article supplement (doi:10.3390/nu11112739), 2019-11-12
Supplement: s1 [file s1]

**Supplementary table 2.** Comparison of FFQs

| Main category               | Food items                                            | Comparison of questionnaires |                      |                  |                        |                   |                   |
|-----------------------------|-------------------------------------------------------|------------------------------|----------------------|------------------|------------------------|-------------------|-------------------|
|                             |                                                       | DHQ III <sup>1</sup>         | Harvard <sup>2</sup> | NNS <sup>3</sup> | Australia <sup>4</sup> | Iran <sup>5</sup> | GINQ <sup>6</sup> |
| Breakfast products          | Breakfast drinks (readymade) <sup>+</sup>             | x                            |                      |                  |                        |                   | x                 |
| Breakfast grains            | Breakfast cereals                                     | x                            | x                    | x                | x                      |                   | x                 |
|                             | Porridge grains                                       | x                            | x                    | x                | x                      |                   | x                 |
|                             | Processed grains                                      |                              |                      | x                | x                      |                   | x                 |
| Dairy                       | Milk <sup>+</sup>                                     | x                            | x                    | x                | x                      | x                 | x                 |
|                             | Milk alternatives <sup>+</sup>                        |                              | x                    | x                | x                      | x                 | x                 |
|                             | Chocolate milk                                        | x                            |                      |                  |                        |                   | x                 |
|                             | Sweetened dairy drinks                                |                              |                      | x                | x                      |                   | x                 |
|                             | Health-improving dairy                                | x                            |                      |                  |                        |                   | x                 |
|                             | Yogurt <sup>+</sup>                                   | x                            | x                    | x                |                        | x                 | x                 |
|                             | Quark <sup>+</sup>                                    |                              |                      |                  |                        | x                 | x                 |
|                             | Dutch custard                                         |                              |                      |                  |                        |                   | x                 |
|                             | Ready-made porridge / pudding / dessert               | x                            |                      |                  |                        |                   | x                 |
|                             | Porridge / pudding                                    |                              |                      |                  | x                      |                   | x                 |
|                             | Sweeteners added to yogurt / quark / etc              |                              |                      |                  |                        |                   | x                 |
|                             | Ice cream products                                    | x                            | x                    | x                | x                      |                   | x                 |
|                             | Hard cheeses <sup>+</sup>                             | x                            | x                    | x                | x                      | x                 | x                 |
|                             | Soft cheeses <sup>+</sup>                             | x                            | x                    | x                | x                      | x                 | x                 |
|                             | Cream <sup>+</sup>                                    | x                            | x                    | x                | x                      | x                 | x                 |
| Bread and bread substitutes | Rusk / biscuit                                        | x                            | x                    | x                |                        |                   | x                 |
|                             | Knäckebröd                                            |                              |                      |                  |                        |                   | x                 |
|                             | Breakfast crackers/crispbread                         |                              |                      |                  | x                      |                   | x                 |
|                             | Croissants                                            |                              |                      |                  | x                      |                   | x                 |
|                             | Hard rolls/ rustic rolls <sup>+</sup>                 | x                            | x                    | x                | x                      |                   | x                 |
|                             | Buns/rolls <sup>+</sup>                               | x                            | x                    | x                | x                      |                   | x                 |
|                             | Bread slices/sandwich bread <sup>+</sup>              | x                            | x                    | x                | x                      | x                 | x                 |
| Fats/oils                   | Butter spreads <sup>+</sup>                           | x                            | x                    |                  | x                      | x                 | x                 |
|                             | Cooking fats/oils                                     | x                            | x                    |                  | x                      | x                 | x                 |
| Spreads                     | Nut pastas <sup>+</sup>                               | x                            | x                    | x                | x                      |                   | x                 |
|                             | Sweet spreads                                         | x                            | x                    | x                | x                      | x                 | x                 |
|                             | Savory (salad/humus) spreads <sup>+</sup>             | x                            |                      | x                | x                      | x                 | x                 |
| Eggs                        | Fried eggs <sup>+</sup>                               | x                            | x                    | x                |                        |                   | x                 |
|                             | Boiled eggs <sup>+</sup>                              | x                            | x                    | x                |                        |                   | x                 |
| Fruits                      | Dried fruits <sup>+</sup>                             | x                            | x                    |                  | x                      | x                 | x                 |
|                             | Fresh fruits <sup>+</sup>                             | x                            | x                    | x                | x                      | x                 | x                 |
|                             | Processed fruits / Preserved fruits <sup>+</sup>      | x                            | x                    |                  | x                      |                   |                   |
| Nuts, stone fruits, seeds   | Nuts, stone fruits <sup>+,°</sup>                     | x                            | x                    | x                | x                      | x                 | x                 |
|                             | Peanuts <sup>+,°</sup>                                | x                            | x                    |                  |                        | x                 | x                 |
|                             | Seeds <sup>+,°</sup>                                  |                              |                      |                  |                        |                   | x                 |
| Meat and meat substitutes   | Raw cold cuts <sup>+</sup>                            |                              |                      |                  |                        |                   | x                 |
|                             | Processed cold cuts <sup>+</sup>                      | x                            | x                    | x                | x                      |                   | x                 |
|                             | Meat <sup>+</sup>                                     | x                            | x                    | x                | x                      | x                 | x                 |
|                             | Gravy                                                 | x                            |                      |                  |                        |                   | x                 |
|                             | Meat substitutes                                      | x                            |                      |                  | x                      |                   | x                 |
| Fish                        | Fresh fish <sup>+</sup>                               | x                            | x                    | x                | x                      | x                 | x                 |
|                             | Raw fish <sup>+</sup>                                 | x                            |                      |                  | x                      |                   |                   |
|                             | Processed fish <sup>+</sup>                           |                              |                      | x                |                        |                   |                   |
|                             | Shellfish <sup>+</sup>                                | x                            |                      | x                | x                      |                   | x                 |
| Vegetables                  | Vegetables <sup>+</sup>                               | x                            | x                    | x                | x                      | x                 | x                 |
|                             | Raw vegetables <sup>+</sup>                           | x                            | x                    | x                | x                      | x                 | x                 |
| Legumes                     | Legumes <sup>+</sup>                                  | x                            | x                    | x                | x                      | x                 | x                 |
| Grain products              | Pasta <sup>+</sup>                                    | x                            | x                    | x                | x                      | x                 | x                 |
|                             | Rice / other grains <sup>+</sup>                      | x                            | x                    | x                | x                      | x                 | x                 |
|                             | Potatoes <sup>+</sup>                                 | x                            | x                    | x                |                        | x                 | x                 |
|                             | Toast, bread, wraps, pita, baguette, etc <sup>+</sup> | x                            | x                    |                  | x                      | x                 |                   |
| Sauces                      | Warm sauces                                           |                              |                      |                  | x                      |                   | x                 |

|                    |                                                               |   |   |   |   |   |   |
|--------------------|---------------------------------------------------------------|---|---|---|---|---|---|
|                    | Dressing <sup>+</sup>                                         | X | X | X | X |   | X |
|                    | Red sauces <sup>+</sup>                                       | X | X |   | X | X | X |
|                    | Mayonnaise and other non-red sauces <sup>+</sup>              | X | X |   | X | X | X |
| Additions to meals | Super foods <sup>+</sup>                                      |   |   |   |   |   | X |
|                    | Seasoning <sup>+</sup>                                        |   |   |   |   |   | X |
|                    | Spices & herbs <sup>+</sup>                                   |   |   |   |   | X | X |
|                    | Spicy                                                         |   |   |   |   |   | X |
|                    | Olives / bell peppers <sup>+</sup>                            |   |   |   |   |   |   |
| Fast food          | Fast food <sup>+</sup>                                        | X | X | X | X |   | X |
| Soup               | Soup <sup>+</sup>                                             | X | X |   |   |   | X |
| Savory snacks      | Chips / pretzels                                              | X | X | X | X |   | X |
|                    | Fried snacks                                                  |   |   |   | X |   | X |
| Sweet snacks       | Chewing gum                                                   |   |   |   | X |   | X |
|                    | Dutch licorice                                                |   |   |   |   |   | X |
|                    | Sweets/candy                                                  |   | X |   | X | X | X |
|                    | Bonbon                                                        | X |   |   |   |   | X |
|                    | Chocolate                                                     | X | X | X | X | X | X |
|                    | Candy bars                                                    | X | X |   |   |   | X |
|                    | Gingerbread <sup>+</sup> / cookie bars / nutritional biscuits | X | X |   | X |   | X |
|                    | Cake / large biscuits                                         | X | X | X | X | X | X |
|                    | Small cookies / biscuits                                      | X | X |   | X | X | X |
|                    | Pastry / pie                                                  | X | X | X | X |   | X |
| Beverages          | Fruit juice                                                   | X | X | X | X | X | X |
|                    | Vegetable juice                                               | X |   | X | X |   | X |
|                    | Tap water                                                     | X |   | X |   |   | X |
|                    | Bottled water / sparkled water                                | X | X |   |   |   | X |
|                    | Coffee <sup>-</sup>                                           | X | X | X | X | X | X |
|                    | Tea                                                           | X | X | X | X | X | X |
|                    | Coffee milk                                                   | X | X | X |   |   | X |
|                    | Sweeteners <sup>+</sup>                                       | X | X | X | X | X | X |
|                    | Soda <sup>-</sup>                                             | X | X |   | X |   | X |
|                    | Lemonade                                                      | X | X | X | X | X | X |
|                    | Sport drinks                                                  | X | X |   |   |   |   |
|                    | Energy drinks                                                 | X |   |   |   |   | X |
|                    | Protein shakes                                                | X |   |   |   |   |   |
|                    | Alcoholic beverages                                           | X | X | X | X |   | X |

1. Diet History Questionnaire III (DHQ III) - <https://epi.grants.cancer.gov/dhq3/>

2. FFQ of Harvard University - <https://regepi.bwh.harvard.edu/health/FFQ/files/2007%20BOOKLET%20FFQ.pdf>

3. FFQ of Australian Bureau of Statistics - National Nutrition Survey 1995- <https://www.abs.gov.au/websitedbs/d3310114.nsf/4a256353001af3ed4b2562bb00121564/b5243fb56a17a812ca2572030023fa>

4. FFQ of Monash University Australia - pdf

5. FFQ of Research Institute Shahid Beheshti University of Medical Sciences Iran - pdf

6. Groningen IBD Nutritional Questionnaires (GINQ-FFQ)

<sup>+</sup> Added to meals (breakfast, lunch, dinner) (or beverages) or eaten as snack in between meals

<sup>-</sup> Salted or unsalted

<sup>-</sup> Caffeinated or decaffeinated
